# Supplementary material for: Alterations in Natural Killer Cells in Colorectal Cancer Patients with Stroma AReactive Invasion Front Areas (SARIFA)
Source: Cancers (Basel). 2023 Feb 3;15(3):994. doi: 10.3390/cancers15030994 (PMC9913252; doi:10.3390/cancers15030994)
Supplement: Supplementary file 1 [file cancers-15-00994-s001.zip › cancers-2151996-supplementary.pdf]

# Supplementary Materials: Alterations in Natural Killer Cells in Colorectal Cancer Patients with Stroma AReactive Invasion Front Areas (SARIFA)

Nic G. Reitsam, Bruno Märkl, Sebastian Dintner, Eva Sipos, Przemyslaw Grochowski, Bianca Grosser, Florian Sommer, Stefan Eser, Pia Nerlinger, Frank Jordan, Andreas Rank and Phillip Löhr and Johanna Waidhauser

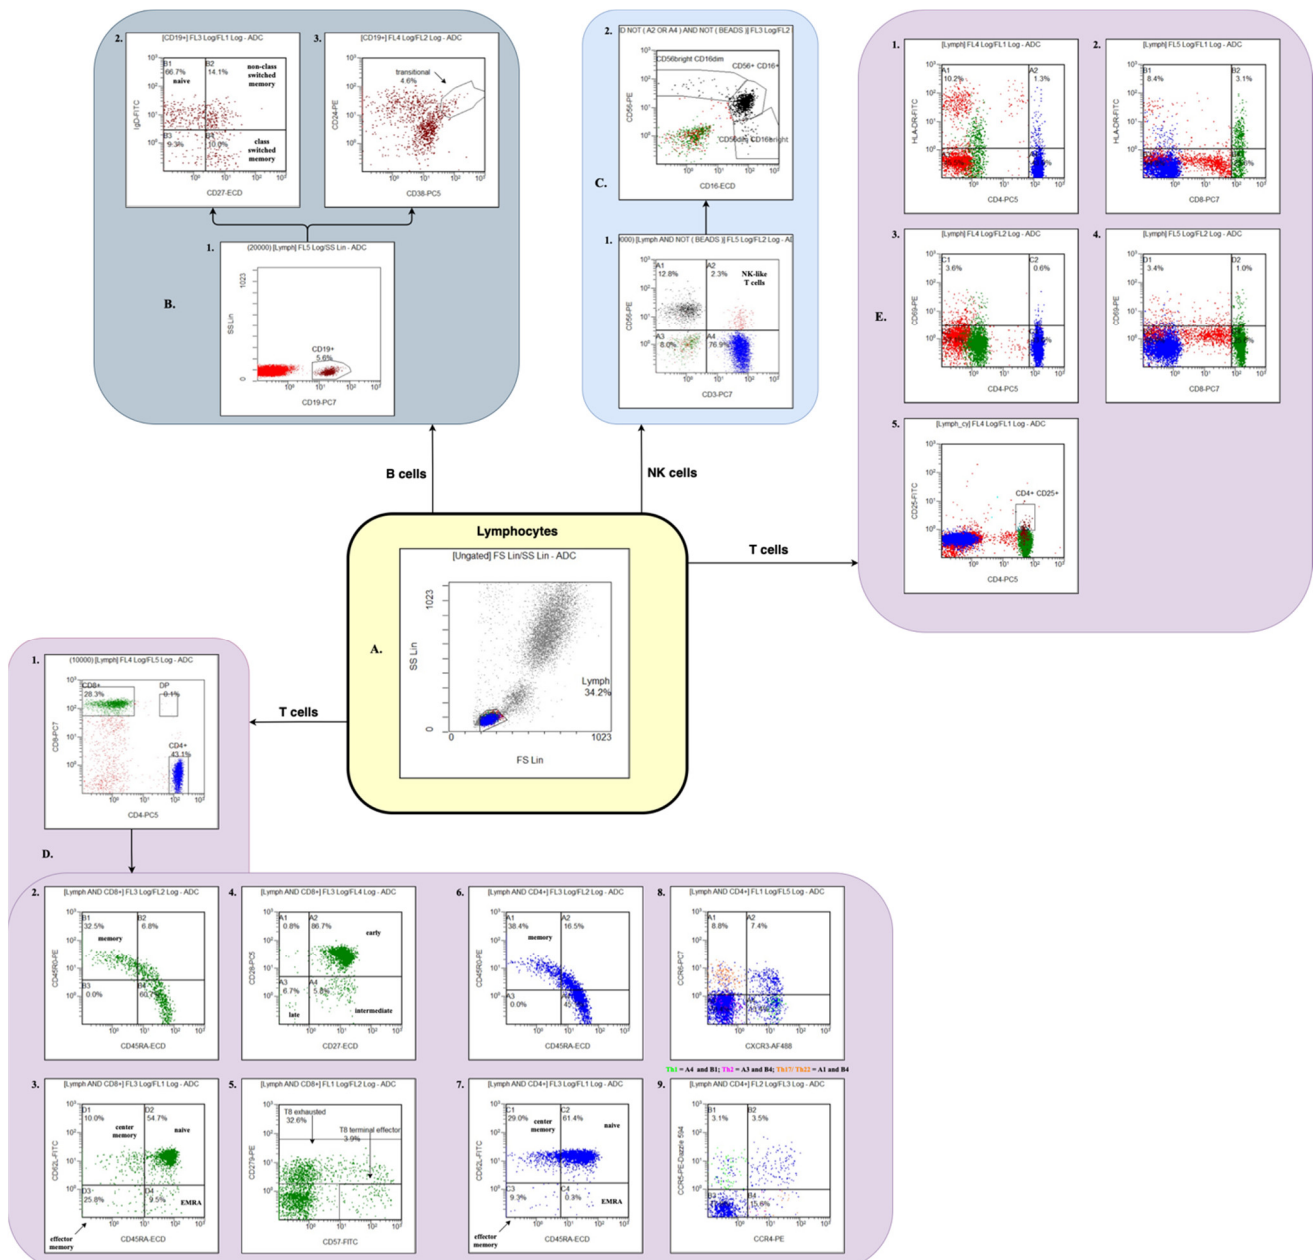

**Figure S1.** Gating Strategy. (A) Lymphocytes were identified by using forward scatter (FC) and side scatter (SC). (B) Additional CD19 positivity was used to define B cells (Plot 1), which were further subdivided into naïve (IgD+), class switched memory (CD27+), non-class switched memory (IgD+, CD27+, Plot 2) and transitional B cells (CD24+, CD38+, Plot 3). (C) NK-like T cells (CD3+ CD56+) were primarily identified (Plot 1). CD3- cells were classified into 3 different subgroups of NK cells (CD56+ CD16+, CD56bright CD16dim, CD56dim CD16bright, Plot 2). (D) T cells were identified by CD4 or CD8 positivity. Bot CD4+ as well as CD8+ cells were subdivided into memory (CD45RA-

CD45RO+) (Plots 1+6), naïve (CD62L+ CD45RA+), central memory (CD62L+ CD45RA-), effector memory (CD62L- CD45RA-) and effector memory RA ("EMRA") (CD62L- CD45RA+) cells (Plot 3+7). To analyze CD8+ cell activity, cells were subdivided into early (CD27+ CD28+), intermediate (CD27+ CD28-), late (CD27- CD28-) (Plot 4), or exhausted (CD279+) and terminal effector (CD279- CD57+) (Plot 5). CD4+ T helper cells were classified into Th1 (CXCR3+ CCR4- CCR5+ CCR6-), Th2 (CXCR- CCR4+ CCR5- CCR6-) and Th17/Th22 (CXCR3- CCR4+ CCR5- CCR6+) (Plot 8+9). (E) CD4+ and CD8+ cells were subdivided into activated cells (HLA-DR+ or CD69+) (Plots 1-4) and regulatory cells (CD4+ CD25<sup>high</sup>) (Plot 5).

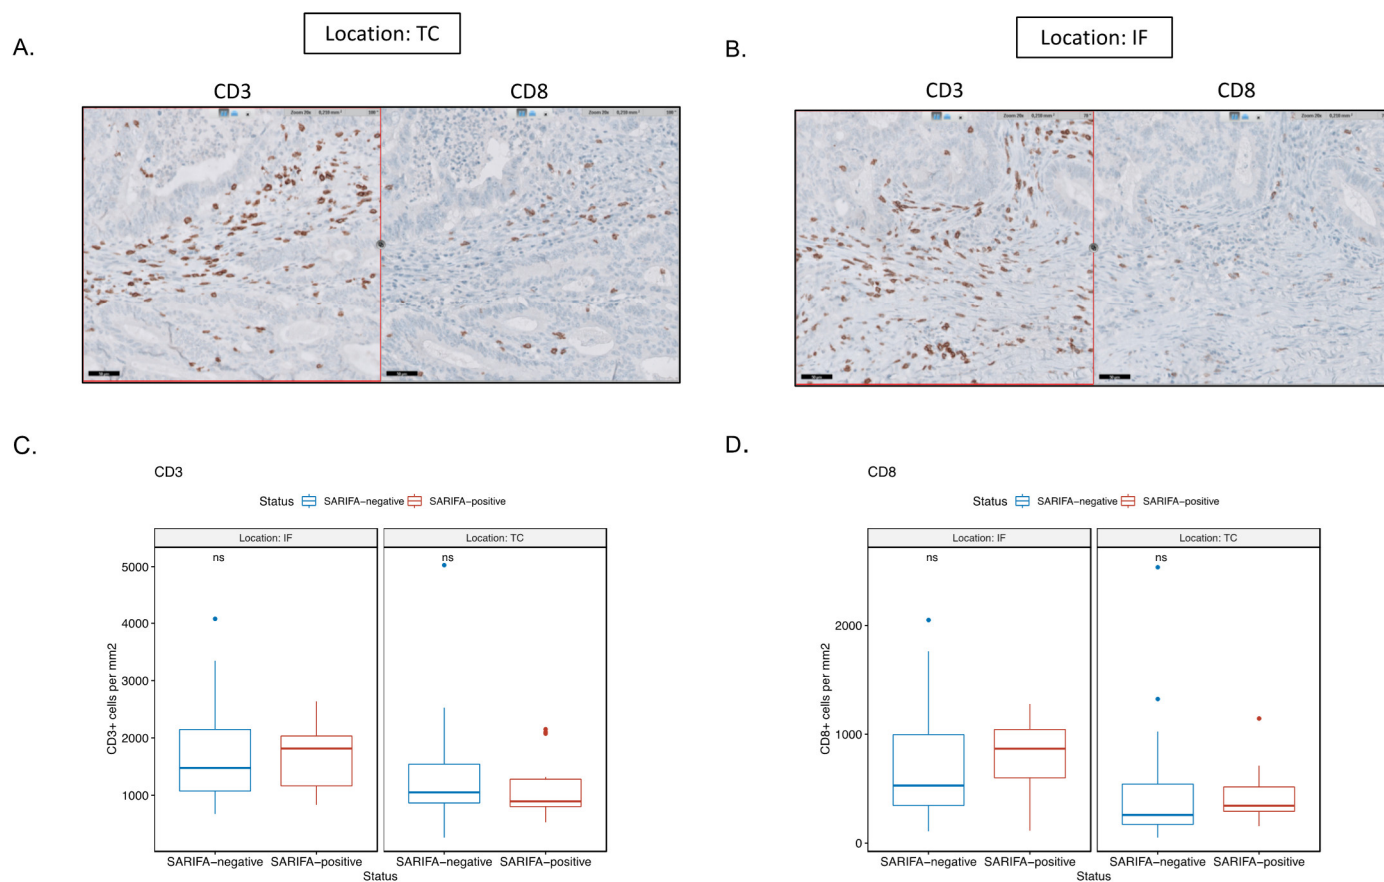

**Figure S2.** Representative immunohistochemical stains for CD3 and CD8 (A, B 200x, scale bar = 50  $\mu$ m). Boxplots showing amount of CD3+ and CD8+ cells automatically counted and extrapolated to 1 mm<sup>2</sup> area comparing between SARIFA-positive and SARIFA-negative CRCs (IFs not necessarily SARIFAs, see also methods 2.4). ns = not significant (at  $p < 0.05$ ).

**Table S1.** Fluorochrome-antibody conjugates

| Cell population                          | Antigen/Anti-body (Ab) | Clone     | Isotype    | Fluorochrome dye | Manufacturer: Beckmann Coulter/Biolegend; item number |
|------------------------------------------|------------------------|-----------|------------|------------------|-------------------------------------------------------|
| T/NK                                     | anti-CD3-Ab CD         | UCHT1     | IgG1       | PC7              | 737657                                                |
| Memory T, activated T, T reg, Th subsets | anti-CD4-Ab            | 13B8.2    | IgG1       | PC5              | A07752                                                |
| Memory T, activated T                    | anti-CD8-Ab            | D3        | IgG1       | PC7              | 737661                                                |
| T/NK                                     | anti-CD16-Ab           | 3G8       | IgG1       | ECD              | A33098                                                |
| T/NK                                     | anti-CD19-Ab           | J3-119    | IgG1       | PC5              | A07771                                                |
| B                                        | anti-CD24-Ab           | ALB9      | IgG1       | PE               | IM1428U                                               |
| Treg                                     | anti-CD25-Ab           | B1.49.9   | IgG2a      | FITC             | IM0478U                                               |
| B, exhausted T                           | anti-CD27-Ab           | 1A4CD27   | IgG1       | ECD              | B26603                                                |
| Exhausted CD8-T                          | anti-CD28-Ab           | CD28.2    | IgG1       | PC5              | 6607108                                               |
| B                                        | anti-CD38-Ab           | LS198-4-3 | IgG1       | PC5              | A07780                                                |
| Memory T, Treg                           | anti-CD45RA-Ab         | LDB9      | IgG1       | ECD              | IM2711U                                               |
| Memory T                                 | anti-CD45RO-Ab         | UCHL1     | IgG2a      | PE               | A07787                                                |
| T/NK                                     | anti-CD56-Ab           | N901/NK-1 | IgG1       | PE               | A07788                                                |
| Exhausted CD8-T                          | anti-CD57-Ab           | NC1       | IgM        | FITC             | B49188                                                |
| Memory T                                 | anti-CD62L-Ab          | DREG56    | IgG1       | FITC             | IM1231U                                               |
| Activated T                              | anti-CD69-Ab           | TP1.55.3  | IgG2b      | PE               | IM1943U                                               |
| Exhausted CD8-T                          | anti-CD279-Ab          | PD1.3     | IgG2b      | PE               | B30634                                                |
| Th subsets                               | anti-CXCR3-Ab (CD183)  | G025H7    | IgG1       | AF488            | B68144                                                |
| Th subsets                               | anti-CCR4-Ab (CD194)   | L291H4    | IgG1       | PE               | 359412                                                |
| Th subsets                               | anti-CCR5-Ab (CD195)   | J418F1    | IgG2b      | PE/Dazzle 594    | 359126                                                |
| Th subsets                               | anti-CCR6-Ab (CD196)   | B-R35     | IgG2a      | PC7              | B68132                                                |
| Treg                                     | anti-FoxP3-Ab          | Ab259D    | IgG1 kappa | PE               | B46031                                                |
| Activated T                              | anti-HLA-DR-Ab         | Immu-357  | IgG1       | FITC             | IM1638U                                               |
| B                                        | anti-IgD-Ab            | IA6-2     | IgG2a      | FITC             | B30652                                                |

FITC fluorescein isothiocyanate, PE phycoerythrin, ECD phycoerythrin-Texas red, PC-5 phycoerythrin cyanin, PC7 phycoerythrin cyanin7, AF488 Alexa-Fluor 488.
